# Supplementary material for: Involvement of miR-30a-5p and miR-30d in Endothelial to Mesenchymal Transition and Early Osteogenic Commitment under Inflammatory Stress in HUVEC
Source: MDPI journal article supplement (doi:10.3390/biom11020226), 2021-02-05
Supplement: s1 [file s1]

## Supplementary File

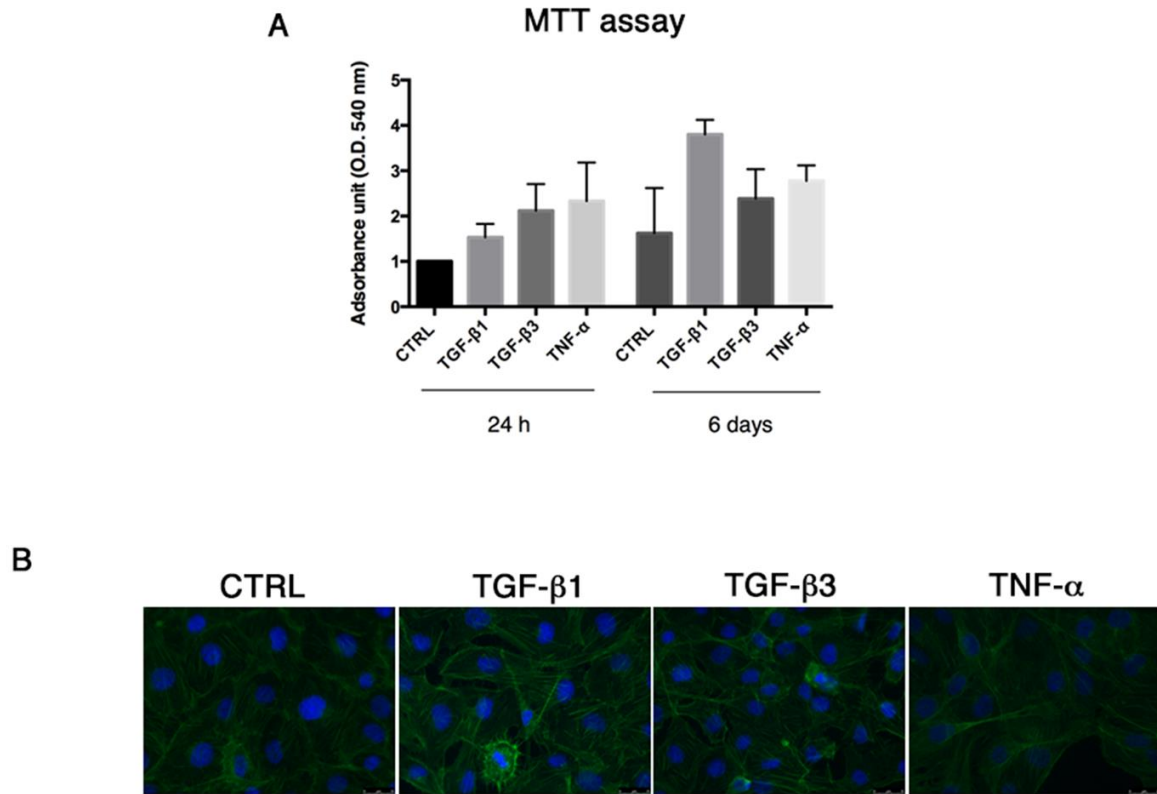

**Figure S1.** End-MT in HUVEC. (A) Analysis of HUVEC viability after 24 h and 6 days exposure to TGF- $\beta$ 1, TGF- $\beta$ 3 and TNF- $\alpha$ . (B) Cytoskeletal changes seen with F-actin immunofluorescence (40 $\times$  magnification).
